# Supplementary material
Source: HighWire-hosted journal article supplement (https://sti.bmj.com/content/96/5/342)

**Web appendix 1: The STI cascade (adapted from: World Health Organization. Global health sector strategy on sexually transmitted infections 2016-2021. Geneva: WHO; 2016)**

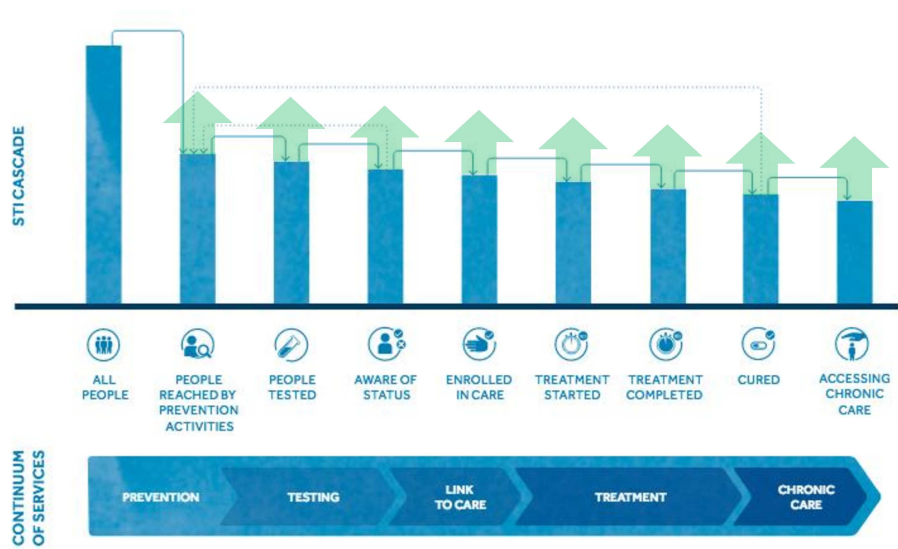

Supplement: inline-supplementary-material-1 [file inline-supplementary-material-1.pdf]
